# Supplementary material for: Study of the Viral and Microbial Communities Associated With Crohn's Disease: A Metagenomic Approach
Source: PubMed Central journal article supplement — Clin Transl Gastroenterol. 2013 Jun 13;4(6):e36–. doi: 10.1038/ctg.2013.9 (PMC3696940; doi:10.1038/ctg.2013.9), 2013-06-13
Supplement: ctg20139x1.pdf [file ctg20139x1.pdf]

**Supplementary Table 1.** Description of CD patients.

| Sample     | Disease status <sup>1</sup> | Leukocyte Count <sup>2</sup> | Lymphocyte count <sup>2</sup> | Therapy (active ingredient) <sup>3</sup>                                        | Steroids | Immunosuppressors |
|------------|-----------------------------|------------------------------|-------------------------------|---------------------------------------------------------------------------------|----------|-------------------|
| <b>IC1</b> | Active                      | 15.9 x 10 <sup>3</sup> /μL   | 0.7 x 10 <sup>3</sup> /μL     | Prednisone                                                                      | Yes      | No                |
| <b>C1</b>  | Active                      | 3.5 x 10 <sup>3</sup> /μL    | 0.7 x 10 <sup>3</sup> /μL     | Azathioprine + Budesonide + Spiraxin                                            | Yes      | Yes               |
| <b>C2</b>  | Active                      | 7.5 x 10 <sup>3</sup> /μL    | 2.0 x 10 <sup>3</sup> /μL     | Methylprednisolone + Metronidazole + Ciprofloxacin + Paracetamol + Pantoprazole | Yes      | No                |
| <b>C3</b>  | Active                      | 5.6 x 10 <sup>3</sup> /μL    | 1.2 x 10 <sup>3</sup> /μL     | Budesonide + Mesalazine + Azathioprine + Tardiferon                             | Yes      | Yes               |
| <b>C4</b>  | Active                      | 9.2 x 10 <sup>3</sup> /μL    | 1.7 x 10 <sup>3</sup> /μL     | Azathioprine + Budesonide                                                       | Yes      | Yes               |
| <b>C5</b>  | Active                      | 6.5 x 10 <sup>3</sup> /μL    | 2.0 x 10 <sup>3</sup> /μL     | Mesalazine + Resincholestyramine                                                | No       | No                |
| <b>C6</b>  | Active                      | 10.3 x 10 <sup>3</sup> /μL   | 3.1 x 10 <sup>3</sup> /μL     | Adalimumab                                                                      | No       | No                |
| <b>C7</b>  | Debut (active)              | 5.1 x 10 <sup>3</sup> /μL    | 1.3 x 10 <sup>3</sup> /μL     | Methylprednisolone + Metronidazole + Ciprofloxacin + Omeprazole                 | Yes      | No                |
| <b>C8</b>  | Active                      | 6.7 x 10 <sup>3</sup> /μL    | 1.7 x 10 <sup>3</sup> /μL     | Azathioprine + Budesonide                                                       | Yes      | Yes               |
| <b>C9</b>  | Inactive                    | 9.9 x 10 <sup>3</sup> /μL    | 2.5 x 10 <sup>3</sup> /μL     | Inflizimab + Atorvastatin + Ferrosanol                                          | No       | No                |
| <b>C10</b> | Active                      | 5.8 x 10 <sup>3</sup> /μL    | 2.5 x 10 <sup>3</sup> /μL     | Mesalazine + Budesonide                                                         | Yes      | No                |

<sup>1</sup>The definition of activity followed the Harvey-Bradshaw index (HBI).

<sup>2</sup>Reference intervals are 4.5-10.8 for leukocyte count and 1.0-3.0 for lymphocyte count, respectively.

<sup>3</sup>Indications of immunosupresor and biological treatment followed the European guideline of the Inflammatory Bowel Disease from the ECCO (European Crohn and Colitis Organization). All patients that started treatment with biological drugs (n=2, 1 Infliximab, 1 adalimumab) had been correctly had their corresponding safety determinations (Mantoux, VHB).
