# Supplementary material for: Study of the Viral and Microbial Communities Associated With Crohn's Disease: A Metagenomic Approach
Source: PubMed Central journal article supplement — Clin Transl Gastroenterol. 2013 Jun 13;4(6):e36–. doi: 10.1038/ctg.2013.9 (PMC3696940; doi:10.1038/ctg.2013.9), 2013-06-13
Supplement: ctg20139x2.pdf [file ctg20139x2.pdf]

**Supplementary Table 2.** List of the differentially represented viral biomarkers found by LefSe, ranked accordingly to their effect size, associated with the group with the highest median. Viral biomarkers appear with their corresponding taxonomic level, before reads assembly (A), and after assembly (B).

(A)

| Viral biomarker                                 | Group     | LDA Score<br>(log10) | p-value |
|-------------------------------------------------|-----------|----------------------|---------|
| <i>Viruses</i>                                  | Volunteer | 5.03                 | 0.0030  |
| <i>Prophages</i>                                | Crohn     | 5.03                 | 0.0030  |
| <i>o__Clostridiales_phage</i>                   | Crohn     | 4.85                 | 0.0318  |
| <i>o__Caudovirales</i>                          | Volunteer | 4.81                 | 0.0082  |
| <i>f__Myoviridae</i>                            | Volunteer | 4.63                 | 0.0318  |
| <i>g__T4_like_viruses</i>                       | Volunteer | 4.50                 | 0.0208  |
| <i>s__Enterobacteria_phage_T4_sensu_lato</i>    | Volunteer | 4.47                 | 0.0475  |
| <i>s__Salmonella_phage_MB78</i>                 | Volunteer | 4.43                 | 0.0082  |
| <i>o__n_n_n_Bartonella_henselae_phage_60457</i> | Volunteer | 4.42                 | 0.0128  |
| <i>f__n_n_Bartonella_henselae_phage_60457</i>   | Volunteer | 4.42                 | 0.0128  |
| <i>s__Bartonella_henselae_phage_60457</i>       | Volunteer | 4.42                 | 0.0128  |
| <i>g__n_Bartonella_henselae_phage_60457</i>     | Volunteer | 4.42                 | 0.0128  |
| <i>s__Streptomyces_phage_phiBT1</i>             | Volunteer | 4.33                 | 0.0062  |
| <i>g__PhiC31_like_viruses</i>                   | Volunteer | 4.33                 | 0.0062  |
| <i>f__Podoviridae</i>                           | Volunteer | 4.30                 | 0.0030  |
| <i>g__T7_like_viruses</i>                       | Volunteer | 4.06                 | 0.0048  |
| <i>s__Phage_PhiI</i>                            | Volunteer | 4.00                 | 0.0098  |
| <i>f__Microviridae</i>                          | Volunteer | 3.85                 | 0.0202  |
| <i>o__n_Microviridae</i>                        | Volunteer | 3.85                 | 0.0202  |
| <i>s__Clostridium_acetobutylicum_phage</i>      | Crohn     | 3.82                 | 0.0447  |
| <i>g__Epsilon15_like_viruses</i>                | Volunteer | 3.66                 | 0.0194  |
| <i>s__Escherichia_phage_phiV10</i>              | Volunteer | 3.66                 | 0.0194  |
| <i>s__Mycobacterium_phage_U2</i>                | Volunteer | 3.60                 | 0.0194  |
| <i>s__Synechococcus_phage_S_CBS1</i>            | Crohn     | 3.53                 | 0.0022  |
| <i>s__Alphapapillomavirus_10</i>                | Volunteer | 3.50                 | 0.0331  |
| <i>o__Alteromonadales_phage</i>                 | Crohn     | 3.48                 | 0.0344  |

| Viral biomarker                               | Group     | LDA Score<br>(log10) | p-value |
|-----------------------------------------------|-----------|----------------------|---------|
| <i>g_Levivirus</i>                            | Volunteer | 3.43                 | 0.0362  |
| <i>o_n_Adenoviridae</i>                       | Volunteer | 3.42                 | 0.0395  |
| <i>f_Adenoviridae</i>                         | Volunteer | 3.42                 | 0.0395  |
| <i>s_Enterobacteria_phage_MS2</i>             | Volunteer | 3.42                 | 0.0447  |
| <i>o_n_n_n_Klebsiella_phage_KPP95</i>         | Volunteer | 3.40                 | 0.0403  |
| <i>f_n_n_Klebsiella_phage_KPP95</i>           | Volunteer | 3.40                 | 0.0403  |
| <i>g_n_Klebsiella_phage_KPP95</i>             | Volunteer | 3.39                 | 0.0403  |
| <i>s_Klebsiella_phage_KPP95</i>               | Volunteer | 3.38                 | 0.0403  |
| <i>s_Bacillus_phage_SPO1</i>                  | Volunteer | 3.35                 | 0.0331  |
| <i>s_Enterobacteria_phage_lambda</i>          | Volunteer | 3.33                 | 0.0159  |
| <i>g_Aviadenovirus</i>                        | Volunteer | 3.31                 | 0.0034  |
| <i>s_Bacillus_phage_0305phi8_36</i>           | Volunteer | 3.30                 | 0.0213  |
| <i>g_Varicellovirus</i>                       | Volunteer | 3.30                 | 0.0257  |
| <i>s_Enterococcus_phage_phiFL4A</i>           | Volunteer | 3.29                 | 0.0101  |
| <i>s_Fowl_adenovirus_A</i>                    | Volunteer | 3.29                 | 0.0109  |
| <i>s_Suid_herpesvirus_1</i>                   | Volunteer | 3.29                 | 0.0205  |
| <i>s_Lettuce_mosaic_virus</i>                 | Volunteer | 3.28                 | 0.0109  |
| <i>g_P22_like_viruses</i>                     | Volunteer | 3.28                 | 0.0320  |
| <i>s_Staphylococcus_epidermidis_phage</i>     | Volunteer | 3.28                 | 0.0362  |
| <i>f_Oxalobacteraceae_phage</i>               | Volunteer | 3.27                 | 0.0331  |
| <i>s_Bacillus_clausii_phage</i>               | Volunteer | 3.26                 | 0.0031  |
| <i>g_Potyvirus</i>                            | Volunteer | 3.25                 | 0.0163  |
| <i>s_Enterobacteria_phage_CP_1639</i>         | Volunteer | 3.24                 | 0.0109  |
| <i>s_Lactobacillus_brevis_phage</i>           | Volunteer | 3.24                 | 0.0163  |
| <i>o_n_n_n_Enterobacteria_phage_CP_1639</i>   | Volunteer | 3.24                 | 0.0109  |
| <i>f_n_n_Enterobacteria_phage_CP_1639</i>     | Volunteer | 3.24                 | 0.0109  |
| <i>s_Janthinobacterium_sp_Marseille_phage</i> | Volunteer | 3.23                 | 0.0331  |
| <i>g_n_Enterobacteria_phage_CP_1639</i>       | Volunteer | 3.22                 | 0.0109  |
| <i>g_Janthinobacterium_phage</i>              | Volunteer | 3.22                 | 0.0331  |
| <i>s_Vibrio_phage_RRE_2008</i>                | Volunteer | 3.21                 | 0.0077  |
| <i>g_c2_like_viruses</i>                      | Volunteer | 3.20                 | 0.0169  |
| <i>s_Yersinia_phage_phiYeO3_12</i>            | Volunteer | 3.19                 | 0.0023  |
| <i>s_Listeria_phage_A511</i>                  | Volunteer | 3.19                 | 0.0403  |

| Viral biomarker                                    | Group     | LDA Score<br>(log10) | p-value |
|----------------------------------------------------|-----------|----------------------|---------|
| <i>s__Lactococcus_phage_CHL92</i>                  | Volunteer | 3.18                 | 0.0042  |
| <i>o__Vibrionales_phage</i>                        | Volunteer | 3.17                 | 0.0184  |
| <i>f__Vibrionaceae_phage</i>                       | Volunteer | 3.16                 | 0.0184  |
| <i>s__Rhodococcus_phage_ReqiPoco6</i>              | Volunteer | 3.16                 | 0.0057  |
| <i>s__Avian_leukosis_virus</i>                     | Volunteer | 3.15                 | 0.0331  |
| <i>s__Mycobacterium_phage_Angelica</i>             | Volunteer | 3.15                 | 0.0034  |
| <i>s__Lactobacillus_casei_phage</i>                | Volunteer | 3.15                 | 0.0123  |
| <i>s__Burkholderia_phage_phiE255</i>               | Volunteer | 3.15                 | 0.0250  |
| <i>s__Streptococcus_phage_YMC_2011</i>             | Volunteer | 3.14                 | 0.0331  |
| <i>s__Burkholderia_vietnamiensis_phage</i>         | Volunteer | 3.13                 | 0.0114  |
| <i>f__Neisseriaceae_phage</i>                      | Volunteer | 3.13                 | 0.0331  |
| <i>o__Neisseriales_phage</i>                       | Volunteer | 3.12                 | 0.0331  |
| <i>s__Rhizobium_phage_16_3</i>                     | Volunteer | 3.12                 | 0.0109  |
| <i>s__Salmonella_phage_A10a</i>                    | Volunteer | 3.11                 | 0.0010  |
| <i>s__Bacillus_cytotoxicus_phage</i>               | Volunteer | 3.11                 | 0.0109  |
| <i>s__Stygiolobus_rod_shaped_virus</i>             | Volunteer | 3.11                 | 0.0430  |
| <i>g__n__Streptococcus_phage_YMC_2011</i>          | Volunteer | 3.11                 | 0.0331  |
| <i>s__Stenotrophomonas_phage_phiSHP2</i>           | Volunteer | 3.10                 | 0.0430  |
| <i>s__Mycobacterium_phage_SirDuracell</i>          | Volunteer | 3.10                 | 0.0331  |
| <i>s__Pseudomonas_phage_Pf3</i>                    | Volunteer | 3.10                 | 0.0023  |
| <i>f__n__n__Streptococcus_phage_YMC_2011</i>       | Volunteer | 3.09                 | 0.0331  |
| <i>s__Propionibacterium_phage_PAS2</i>             | Volunteer | 3.08                 | 0.0034  |
| <i>s__Enterobacteria_phage_Mu</i>                  | Volunteer | 3.08                 | 0.0109  |
| <i>o__n__n__n__Mycobacterium_phage_SirDuracell</i> | Volunteer | 3.07                 | 0.0331  |
| <i>s__Haemophilus_influenzae_phage</i>             | Volunteer | 3.07                 | 0.0430  |
| <i>o__n__n__n__Mycobacterium_phage_Oosterbaan</i>  | Volunteer | 3.07                 | 0.0109  |
| <i>s__Shigella_phage_Sf6</i>                       | Volunteer | 3.07                 | 0.0058  |
| <i>s__Mycobacterium_phage_Oosterbaan</i>           | Volunteer | 3.06                 | 0.0109  |
| <i>g__Acholeplasma_phage</i>                       | Volunteer | 3.06                 | 0.0291  |
| <i>s__Listeria_phage_B025</i>                      | Volunteer | 3.06                 | 0.0109  |
| <i>g__n__Mycobacterium_phage_SirDuracell</i>       | Volunteer | 3.05                 | 0.0331  |
| <i>o__Acholeplasmatales_phage</i>                  | Volunteer | 3.05                 | 0.0291  |
| <i>s__Acholeplasma_laidlawii_phage</i>             | Volunteer | 3.05                 | 0.0291  |

| Viral biomarker                                  | Group     | LDA Score<br>(log10) | p-value |
|--------------------------------------------------|-----------|----------------------|---------|
| <i>f__Acholeplasmataceae_phage</i>               | Volunteer | 3.05                 | 0.0291  |
| <i>g__n_Mycobacterium_phage_Oosterbaan</i>       | Volunteer | 3.05                 | 0.0109  |
| <i>s__Clostridium_phage_c_st</i>                 | Volunteer | 3.04                 | 0.0430  |
| <i>f__n_n_Mycobacterium_phage_SirDuracell</i>    | Volunteer | 3.04                 | 0.0331  |
| <i>f__n_n_Mycobacterium_phage_Oosterbaan</i>     | Volunteer | 3.04                 | 0.0109  |
| <i>s__Clostridium_phage_phiCP340</i>             | Volunteer | 3.03                 | 0.0331  |
| <i>o__n_n_n_Streptococcus_phage_YMC_2011</i>     | Volunteer | 3.03                 | 0.0331  |
| <i>s__Mycobacterium_phage_Giles</i>              | Volunteer | 3.03                 | 0.0331  |
| <i>g__Haemophilus_phage</i>                      | Volunteer | 3.02                 | 0.0430  |
| <i>s__Vibrio_phage_SIO_2</i>                     | Volunteer | 3.01                 | 0.0250  |
| <i>s__Vibrio_phage_VHML</i>                      | Volunteer | 3.01                 | 0.0109  |
| <i>s__Rhodococcus_phage_ReqiPine5</i>            | Volunteer | 3.01                 | 0.0274  |
| <i>s__Mosquito_VEM_virus_SDRBAJ</i>              | Volunteer | 2.99                 | 0.0109  |
| <i>s__Xanthomonas_phage_OP2</i>                  | Volunteer | 2.98                 | 0.0447  |
| <i>g__Betapapillomavirus</i>                     | Volunteer | 2.98                 | 0.0034  |
| <i>o__n_n_n_Mosquito_VEM_virus_SDRBAJ</i>        | Volunteer | 2.98                 | 0.0109  |
| <i>s__Escherichia_phage_phiEB49</i>              | Volunteer | 2.98                 | 0.0321  |
| <i>f__n_n_Escherichia_phage_phiEB49</i>          | Volunteer | 2.97                 | 0.0321  |
| <i>g__n_Escherichia_phage_phiEB49</i>            | Volunteer | 2.97                 | 0.0321  |
| <i>o__n_n_n_Escherichia_phage_phiEB49</i>        | Volunteer | 2.97                 | 0.0321  |
| <i>s__Salmonella_phage_ST64T</i>                 | Volunteer | 2.95                 | 0.0109  |
| <i>f__n_n_Mosquito_VEM_virus_SDRBAJ</i>          | Volunteer | 2.95                 | 0.0109  |
| <i>g__n_Mosquito_VEM_virus_SDRBAJ</i>            | Volunteer | 2.93                 | 0.0109  |
| <i>s__Streptococcus_phage_Sfi21</i>              | Volunteer | 2.93                 | 0.0034  |
| <i>s__Streptococcus_pyogenes_phage_T12</i>       | Volunteer | 2.92                 | 0.0109  |
| <i>f__n_n_Streptococcus_pyogenes_phage_T12</i>   | Volunteer | 2.92                 | 0.0109  |
| <i>s__Herminiimonas_arsenicoydans_phage</i>      | Volunteer | 2.92                 | 0.0109  |
| <i>g__n_Streptococcus_pyogenes_phage_T12</i>     | Volunteer | 2.91                 | 0.0109  |
| <i>s__Betapapillomavirus_2</i>                   | Volunteer | 2.91                 | 0.0109  |
| <i>o__n_n_n_Streptococcus_pyogenes_phage_T12</i> | Volunteer | 2.90                 | 0.0109  |
| <i>g__Herminiimonas_phage</i>                    | Volunteer | 2.89                 | 0.0109  |
| <i>s__Bacillus_subtilis_phage</i>                | Volunteer | 2.86                 | 0.0109  |
| <i>s__Geobacillus_kaustophilus_phage</i>         | Volunteer | 2.83                 | 0.0034  |

(B)

| Viral biomarker                                 | Group     | LDA Score<br>(log10) | p-value |
|-------------------------------------------------|-----------|----------------------|---------|
| <i>f__n_n_Bartonella_henselae_phage_60457</i>   | Volunteer | 4.39                 | 0.0087  |
| <i>g__n_Bartonella_henselae_phage_60457</i>     | Volunteer | 4.38                 | 0.0087  |
| <i>s__Bartonella_henselae_phage_60457</i>       | Volunteer | 4.38                 | 0.0087  |
| <i>o__n_n_n_Bartonella_henselae_phage_60457</i> | Volunteer | 4.38                 | 0.0087  |
| <i>o__n_Retroviridae</i>                        | Crohn     | 4.21                 | 0.0315  |
| <i>f__Retroviridae</i>                          | Crohn     | 4.21                 | 0.0315  |
| <i>f__Podoviridae</i>                           | Volunteer | 4.06                 | 0.0258  |
| <i>g__PhiC31_like_viruses</i>                   | Volunteer | 4.06                 | 0.0005  |
| <i>s__Streptomyces_phage_phiBT1</i>             | Volunteer | 4.06                 | 0.0005  |
| <i>s__Salmonella_phage_MB78</i>                 | Volunteer | 4.01                 | 0.0287  |
| <i>s__Streptococcus_phage_TP_J34</i>            | Volunteer | 3.90                 | 0.0321  |
| <i>f__Sphingomonadaceae_phage</i>               | Volunteer | 3.77                 | 0.0060  |
| <i>o__Sphingomonadales_phage</i>                | Volunteer | 3.77                 | 0.0060  |
| <i>g__Caudovirales_n_n</i>                      | Volunteer | 3.76                 | 0.0124  |
| <i>f__Caudovirales_n</i>                        | Volunteer | 3.76                 | 0.0124  |
| <i>s__Phage_PhiI</i>                            | Volunteer | 3.75                 | 0.0343  |
| <i>o__n_n_n_Klebsiella_phage_KPP95</i>          | Volunteer | 3.71                 | 0.0403  |
| <i>s__Klebsiella_phage_KPP95</i>                | Volunteer | 3.71                 | 0.0403  |
| <i>f__n_n_Klebsiella_phage_KPP95</i>            | Volunteer | 3.71                 | 0.0403  |
| <i>g__Sphingopyxis_phage</i>                    | Volunteer | 3.71                 | 0.0245  |
| <i>s__Sphingopyxis_alaskensis_phage</i>         | Volunteer | 3.71                 | 0.0245  |
| <i>g__n_Klebsiella_phage_KPP95</i>              | Volunteer | 3.71                 | 0.0403  |
| <i>o__n_Microviridae</i>                        | Volunteer | 3.71                 | 0.0067  |
| <i>f__Microviridae</i>                          | Volunteer | 3.71                 | 0.0067  |
| <i>s__Synechococcus_phage_S_CBS1</i>            | Crohn     | 3.70                 | 0.0022  |
| <i>s__Xanthomonas_phage_OP2</i>                 | Volunteer | 3.69                 | 0.0088  |
| <i>g__P22_like_viruses</i>                      | Volunteer | 3.58                 | 0.0184  |
| <i>s__Burkholderia_vietnamiensis_phage</i>      | Volunteer | 3.55                 | 0.0015  |
| <i>f__Fuselloviridae</i>                        | Volunteer | 3.53                 | 0.0109  |
| <i>s__Rhodococcus_phage_ReqiPoco6</i>           | Volunteer | 3.50                 | 0.0057  |
| <i>g__Fusellovirus</i>                          | Volunteer | 3.47                 | 0.0109  |

| Viral biomarker                                 | Group     | LDA Score<br>(log10) | p-value |
|-------------------------------------------------|-----------|----------------------|---------|
| <i>s__Shigella_phage_Sf6</i>                    | Volunteer | 3.44                 | 0.0010  |
| <i>o__n__Fuselloviridae</i>                     | Volunteer | 3.44                 | 0.0109  |
| <i>s__Mycobacterium_phage_Giles</i>             | Volunteer | 3.43                 | 0.0109  |
| <i>s__Streptococcus_phage_Sfi21</i>             | Volunteer | 3.43                 | 0.0034  |
| <i>s__Enterobacteria_phage_P1</i>               | Volunteer | 3.40                 | 0.0345  |
| <i>g__P1_like_viruses</i>                       | Volunteer | 3.40                 | 0.0345  |
| <i>s__Salmonella_phage_A10a</i>                 | Volunteer | 3.34                 | 0.0034  |
| <i>g__Betapapillomavirus</i>                    | Volunteer | 3.33                 | 0.0109  |
| <i>s__Betapapillomavirus_2</i>                  | Volunteer | 3.33                 | 0.0109  |
| <i>s__Rhodococcus_phage_ReqiPine5</i>           | Volunteer | 3.32                 | 0.0216  |
| <i>g__Microvirus</i>                            | Volunteer | 3.31                 | 0.0430  |
| <i>s__Listeria_phage_A511</i>                   | Volunteer | 3.27                 | 0.0430  |
| <i>s__Propionibacterium_phage_PAS2</i>          | Volunteer | 3.25                 | 0.0034  |
| <i>f__Oxalobacteraceae_phage</i>                | Volunteer | 3.25                 | 0.0331  |
| <i>g__Alphavirus</i>                            | Volunteer | 3.24                 | 0.0430  |
| <i>s__Salmon_pancreas_disease_virus</i>         | Volunteer | 3.24                 | 0.0430  |
| <i>s__Yersinia_phage_phiYeO3_12</i>             | Volunteer | 3.20                 | 0.0109  |
| <i>s__Burkholderia_phage_phiE255</i>            | Volunteer | 3.18                 | 0.0250  |
| <i>s__Lactococcus_phage_CHL92</i>               | Volunteer | 3.18                 | 0.0131  |
| <i>s__Janthinobacterium_sp__Marseille_phage</i> | Volunteer | 3.18                 | 0.0331  |
| <i>g__Janthinobacterium_phage</i>               | Volunteer | 3.18                 | 0.0331  |
| <i>s__Haemophilus_influenzae_phage</i>          | Volunteer | 3.17                 | 0.0109  |
| <i>s__Lactococcus_phage_TP901_1</i>             | Volunteer | 3.17                 | 0.0109  |
| <i>s__Lactobacillus_casei_phage</i>             | Volunteer | 3.15                 | 0.0213  |
| <i>g__Haemophilus_phage</i>                     | Volunteer | 3.14                 | 0.0109  |
| <i>s__Vibrio_phage_VSK</i>                      | Volunteer | 3.14                 | 0.0109  |

Features are discriminative when values are above a non-negative threshold for the logarithmic LDA score =2.0, and p-value  $\leq \alpha=0.05$ .

Green color: differentially represented towards volunteers; red color: differentially represented towards Crohn's patients.

Taxonomic level: o\_\_: order, f\_\_: family, g\_\_: genus, s\_\_: species.
