# Supplementary material for: Study of the Viral and Microbial Communities Associated With Crohn's Disease: A Metagenomic Approach
Source: PubMed Central journal article supplement — Clin Transl Gastroenterol. 2013 Jun 13;4(6):e36–. doi: 10.1038/ctg.2013.9 (PMC3696940; doi:10.1038/ctg.2013.9), 2013-06-13
Supplement: ctg20139x3.pdf [file ctg20139x3.pdf]

**Supplementary Table 3.** Database of Pfam IDs that have no equivalent TIGRfam hits and relative abundance per sample.

| #ID | Function                                                                | C1 | C2   | C3 | C4   | C5   | C6   | C7   | C8   | C9   | C10 | IC1  | V1   | V2   | V3   | V4 | V5 | V6   | V7   | V8   |
|-----|-------------------------------------------------------------------------|----|------|----|------|------|------|------|------|------|-----|------|------|------|------|----|----|------|------|------|
| 1   | PF00004_ATPase family associated with various cellular activities (AAA) | -  | -    | -  | -    | -    | -    | -    | 1.20 | -    | -   | -    | -    | -    | -    | -  | -  | 0.55 | -    | -    |
| 2   | PF00005_ABC transporter                                                 | -  | -    | -  | -    | 1.49 | -    | -    | -    | -    | -   | -    | -    | -    | -    | -  | -  | -    | -    | -    |
| 3   | PF00015_Methyl-accepting chemotaxis protein (MCP) signaling domain      | -  | -    | -  | -    | 2.99 | -    | -    | -    | -    | -   | -    | -    | -    | -    | -  | -  | -    | -    | -    |
| 4   | PF00072_Response regulator receiver domain                              | -  | -    | -  | -    | -    | -    | -    | -    | -    | -   | -    | -    | -    | 0.69 | -  | -  | 0.55 | -    | -    |
| 5   | PF00075_RNase H                                                         | -  | -    | -  | -    | -    | -    | -    | -    | 4.35 | -   | -    | -    | 0.58 | -    | -  | -  | 0.55 | -    | 2.17 |
| 6   | PF00079_Serpin (serine protease inhibitor)                              | -  | 0.94 | -  | -    | -    | -    | -    | -    | -    | -   | -    | -    | -    | -    | -  | -  | -    | -    | -    |
| 7   | PF00092_von Willebrand factor type A domain                             | -  | -    | -  | -    | -    | -    | -    | -    | -    | -   | -    | -    | -    | -    | -  | -  | 0.55 | -    | -    |
| 8   | PF00112_Papain family cysteine protease                                 | -  | -    | -  | -    | -    | -    | -    | -    | -    | -   | -    | -    | 0.58 | -    | -  | -  | -    | -    | -    |
| 9   | PF00144_Beta-lactamase                                                  | -  | -    | -  | -    | -    | -    | -    | -    | -    | -   | -    | 0.84 | 0.58 | 0.69 | -  | -  | -    | 1.69 | 2.17 |
| 10  | PF00149_Calcineurin-like phosphoesterase                                | -  | -    | -  | -    | 1.49 | -    | -    | 1.20 | -    | -   | -    | -    | -    | -    | -  | -  | -    | -    | -    |
| 11  | PF00165_Bacterial regulatory helix-turn-helix proteins. AraC family     | -  | -    | -  | -    | -    | -    | -    | -    | -    | -   | -    | -    | -    | -    | -  | -  | 1.10 | -    | -    |
| 12  | PF00166_Chaperonin 10 Kd subunit                                        | -  | -    | -  | -    | 1.49 | -    | -    | -    | -    | -   | -    | -    | 0.58 | -    | -  | -  | -    | -    | -    |
| 13  | PF00176_SNF2 family N-terminal domain                                   | -  | 0.94 | -  | 0.89 | 2.99 | 1.69 | -    | -    | -    | -   | -    | 0.84 | 0.58 | 0.69 | -  | -  | -    | -    | -    |
| 14  | PF00186_Dihydrofolate reductase                                         | -  | 0.94 | -  | 3.57 | -    | 1.69 | -    | -    | -    | -   | -    | -    | -    | -    | -  | -  | -    | -    | -    |
| 15  | PF00196_Bacterial regulatory proteins. luxR family                      | -  | -    | -  | 0.89 | -    | -    | -    | -    | -    | -   | -    | -    | -    | -    | -  | -  | -    | -    | -    |
| 16  | PF00216_Bacterial DNA-binding protein                                   | -  | -    | -  | -    | -    | -    | -    | -    | -    | -   | -    | -    | -    | -    | -  | -  | 0.55 | -    | -    |
| 17  | PF00230_Major intrinsic protein                                         | -  | -    | -  | -    | -    | -    | -    | -    | -    | -   | -    | -    | 0.58 | -    | -  | -  | -    | -    | -    |
| 18  | PF00239_Resolvase. N terminal domain                                    | -  | 3.77 | -  | -    | -    | -    | 5.56 | 1.20 | 4.35 | -   | 3.70 | 1.68 | 2.91 | 2.76 | -  | -  | -    | -    | 4.35 |
| 19  | PF00248_Aldo/keto reductase family                                      | -  | -    | -  | -    | -    | -    | -    | -    | -    | -   | -    | -    | 0.58 | -    | -  | -  | -    | -    | -    |
| 20  | PF00251_Glycosyl hydrolases family 32 N terminal                        | -  | 0.94 | -  | -    | -    | -    | -    | -    | -    | -   | -    | -    | -    | -    | -  | -  | -    | -    | -    |
| 21  | PF00265_Thymidine kinase                                                | -  | -    | -  | 1.79 | -    | -    | -    | -    | -    | -   | -    | -    | -    | -    | -  | -  | -    | -    | -    |
| 22  | PF00266_Aminotransferase class-V                                        | -  | -    | -  | -    | -    | -    | -    | -    | -    | -   | -    | -    | 0.58 | -    | -  | -  | -    | -    | -    |
| 23  | PF00268_Ribonucleotide reductase. small chain                           | -  | -    | -  | -    | -    | -    | -    | -    | -    | -   | -    | 0.84 | -    | -    | -  | -  | -    | -    | -    |
| 24  | PF00270_DEAD/DEAH box helicase                                          | -  | 0.94 | -  | -    | -    | -    | -    | -    | -    | -   | -    | -    | -    | -    | -  | -  | -    | -    | -    |
| 25  | PF00271_Helicase conserved C-terminal domain                            | -  | 0.94 | -  | -    | -    | -    | 1.85 | -    | 4.35 | -   | -    | 0.84 | -    | 2.07 | -  | -  | 0.55 | -    | -    |



| #ID | Function                                                                          | C1   | C2   | C3   | C4   | C5   | C6   | C7   | C8   | C9   | C10   | IC1   | V1   | V2   | V3   | V4   | V5 | V6   | V7   | V8   |
|-----|-----------------------------------------------------------------------------------|------|------|------|------|------|------|------|------|------|-------|-------|------|------|------|------|----|------|------|------|
| 52  | PF00573_Ribosomal protein L4/L1 family                                            | -    | 0.94 | -    | -    | -    | -    | -    | -    | -    | -     | -     | -    | -    | -    | -    | -  | -    | -    | -    |
| 53  | PF00574_Clp protease                                                              | -    | 0.94 | -    | -    | -    | -    | -    | -    | -    | -     | -     | -    | -    | -    | -    | -  | -    | -    | -    |
| 54  | PF00577_Fimbrial Usher protein                                                    | -    | -    | -    | -    | -    | -    | -    | -    | -    | -     | -     | -    | 0.58 | -    | -    | -  | -    | -    | -    |
| 55  | PF00583_Acetyltransferase (GNAT) family                                           | -    | -    | -    | 1.79 | -    | -    | -    | 1.20 | -    | -     | -     | -    | -    | -    | -    | -  | -    | -    | -    |
| 56  | PF00589_Phage integrase family                                                    | 6.45 | 1.89 | -    | -    | 1.49 | 3.39 | 3.70 | 3.61 | -    | 12.50 | -     | -    | 2.33 | 7.59 | -    | -  | 3.87 | -    | -    |
| 57  | PF00618_Guanine nucleotide exchange factor for Ras-like GTPases; N-terminal motif | -    | -    | -    | -    | -    | 1.69 | -    | -    | 4.35 | -     | -     | -    | -    | -    | -    | -  | -    | -    | -    |
| 58  | PF00639_PPIC-type PPIASE domain                                                   | -    | -    | -    | 0.89 | -    | -    | -    | -    | -    | -     | -     | -    | -    | -    | -    | -  | -    | -    | -    |
| 59  | PF00657_GDSL-like Lipase/Acylhydrolase                                            | -    | -    | -    | -    | -    | -    | -    | -    | -    | -     | -     | -    | 0.58 | 0.69 | -    | -  | -    | -    | -    |
| 60  | PF00665_Integrase core domain                                                     | -    | 2.83 | 6.90 | 1.79 | 2.99 | 6.78 | 3.70 | 2.41 | -    | -     | 3.70  | -    | 2.91 | 2.07 | -    | -  | 2.21 | -    | 8.70 |
| 61  | PF00672_HAMP domain                                                               | -    | -    | -    | -    | -    | -    | -    | -    | -    | -     | 3.70  | -    | -    | -    | -    | -  | -    | -    | -    |
| 62  | PF00675_Insulinase (Peptidase family M16)                                         | -    | -    | -    | -    | -    | -    | -    | -    | -    | -     | -     | -    | -    | -    | -    | -  | 0.55 | -    | -    |
| 63  | PF00691_OmpA family                                                               | -    | 0.94 | -    | -    | -    | -    | -    | -    | -    | -     | -     | -    | -    | -    | -    | -  | -    | -    | -    |
| 64  | PF00703_Glycosyl hydrolases family 2. immunoglobulin-like beta-sandwich domain    | -    | -    | -    | -    | -    | -    | -    | -    | -    | -     | -     | -    | 0.58 | 0.69 | -    | -  | -    | -    | -    |
| 65  | PF00704_Glycosyl hydrolases family 18                                             | -    | -    | -    | -    | -    | -    | -    | -    | -    | -     | -     | -    | -    | 0.69 | -    | -  | -    | -    | -    |
| 66  | PF00717_Peptidase S24-like                                                        | -    | 0.94 | -    | 0.89 | -    | -    | -    | -    | -    | -     | -     | -    | -    | -    | -    | -  | 0.55 | -    | -    |
| 67  | PF00719_Inorganic pyrophosphatase                                                 | -    | -    | -    | -    | -    | -    | -    | -    | -    | -     | -     | -    | -    | -    | -    | -  | 0.55 | -    | -    |
| 68  | PF00721_Virus coat protein (TMV like)                                             | -    | 0.94 | -    | -    | -    | -    | -    | -    | -    | -     | -     | -    | -    | -    | -    | -  | -    | -    | -    |
| 69  | PF00753_Metallo-beta-lactamase superfamily                                        | -    | -    | -    | -    | -    | -    | 1.85 | -    | -    | -     | -     | -    | -    | -    | -    | -  | 0.55 | -    | 2.17 |
| 70  | PF00754_F5/8 type C domain                                                        | -    | -    | -    | -    | -    | -    | -    | -    | -    | -     | -     | -    | -    | 0.69 | -    | -  | -    | -    | -    |
| 71  | PF00768_D-alanyl-D-alanine carboxypeptidase                                       | -    | -    | -    | -    | -    | -    | -    | -    | -    | -     | -     | 0.84 | 0.58 | -    | -    | -  | 1.10 | -    | -    |
| 72  | PF00799_Geminivirus Rep catalytic domain                                          | -    | -    | -    | -    | -    | -    | -    | -    | -    | -     | -     | -    | -    | -    | -    | -  | -    | 1.69 | -    |
| 73  | PF00805_Pentapeptide repeats (8 copies)                                           | -    | -    | -    | -    | -    | -    | -    | 1.20 | -    | -     | -     | -    | 0.58 | 0.69 | 7.69 | -  | -    | -    | -    |
| 74  | PF00814_Glycoprotease family                                                      | -    | -    | -    | -    | 1.49 | -    | -    | 1.20 | -    | -     | -     | -    | -    | -    | -    | -  | -    | -    | -    |
| 75  | PF00817_impB/mucB/samB family                                                     | -    | -    | -    | -    | 1.49 | 3.39 | -    | -    | -    | -     | 3.70  | -    | -    | 0.69 | -    | -  | -    | -    | -    |
| 76  | PF00847_AP2 domain                                                                | 3.23 | 0.94 | -    | -    | -    | -    | -    | -    | -    | -     | -     | -    | -    | -    | -    | -  | -    | -    | -    |
| 77  | PF00872_Transposase. Mutator family                                               | -    | 0.94 | 3.45 | -    | -    | 1.69 | -    | 1.20 | -    | -     | 29.63 | -    | -    | 0.69 | -    | -  | -    | -    | -    |

| #ID | Function                                                                | C1 | C2   | C3   | C4   | C5   | C6   | C7   | C8   | C9   | C10  | IC1 | V1   | V2   | V3   | V4 | V5 | V6   | V7 | V8 |
|-----|-------------------------------------------------------------------------|----|------|------|------|------|------|------|------|------|------|-----|------|------|------|----|----|------|----|----|
| 78  | PF00873_AcrB/AcrD/AcrF family                                           | -  | -    | -    | -    | -    | -    | -    | -    | -    | -    | -   | 0.84 | -    | -    | -  | -  | 0.55 | -  | -  |
| 79  | PF00877_NlpC/P60 family                                                 | -  | 0.94 | -    | -    | -    | -    | -    | -    | -    | -    | -   | -    | -    | -    | -  | -  | -    | -  | -  |
| 80  | PF00893_Small Multidrug Resistance protein                              | -  | -    | -    | -    | 1.49 | -    | -    | 1.20 | -    | -    | -   | -    | 1.16 | -    | -  | -  | -    | -  | -  |
| 81  | PF00899_ThiF family                                                     | -  | -    | -    | -    | 1.49 | -    | -    | -    | -    | -    | -   | -    | -    | -    | -  | -  | -    | -  | -  |
| 82  | PF00903_Glyoxalase/Bleomycin resistance protein/Dioxygenase superfamily | -  | -    | -    | -    | -    | 1.69 | -    | 1.20 | -    | -    | -   | -    | -    | -    | -  | -  | -    | -  | -  |
| 83  | PF00950_ABC 3 transport family                                          | -  | -    | -    | 0.89 | -    | -    | -    | -    | -    | -    | -   | -    | -    | -    | -  | -  | 0.55 | -  | -  |
| 84  | PF00959_Phage lysozyme                                                  | -  | -    | -    | 5.36 | 1.49 | -    | -    | 1.20 | -    | -    | -   | 1.68 | -    | -    | -  | -  | 0.55 | -  | -  |
| 85  | PF00978_RNA dependent RNA polymerase                                    | -  | 0.94 | -    | -    | -    | -    | -    | -    | -    | -    | -   | -    | -    | -    | -  | -  | -    | -  | -  |
| 86  | PF01022_Bacterial regulatory protein. arsR family                       | -  | -    | -    | -    | -    | -    | -    | -    | -    | 4.17 | -   | -    | -    | -    | -  | -  | 0.55 | -  | -  |
| 87  | PF01032_FecCD transport family                                          | -  | -    | -    | -    | -    | -    | -    | -    | -    | -    | -   | -    | 0.58 | -    | -  | -  | -    | -  | -  |
| 88  | PF01047_MarR family                                                     | -  | -    | -    | -    | -    | -    | -    | -    | -    | -    | -   | -    | -    | -    | -  | -  | 0.55 | -  | -  |
| 89  | PF01051_Initiator Replication protein                                   | -  | 0.94 | 3.45 | 0.89 | 1.49 | 1.69 | 1.85 | -    | 4.35 | 4.17 | -   | -    | -    | -    | -  | -  | 0.55 | -  | -  |
| 90  | PF01063_Aminotransferase class IV                                       | -  | -    | -    | -    | 1.49 | -    | -    | -    | -    | -    | -   | -    | -    | -    | -  | -  | -    | -  | -  |
| 91  | PF01068_ATP dependent DNA ligase domain                                 | -  | -    | -    | 0.89 | -    | -    | -    | 1.20 | -    | -    | -   | -    | 1.16 | -    | -  | -  | -    | -  | -  |
| 92  | PF01076_Plasmid recombination enzyme                                    | -  | -    | -    | -    | -    | 1.69 | -    | 1.20 | -    | -    | -   | -    | 1.16 | -    | -  | -  | -    | -  | -  |
| 93  | PF01107_Viral movement protein (MP)                                     | -  | 0.94 | -    | -    | -    | -    | -    | -    | -    | -    | -   | -    | -    | -    | -  | -  | -    | -  | -  |
| 94  | PF01136_Peptidase family U32                                            | -  | 0.94 | -    | -    | -    | -    | -    | -    | -    | -    | -   | -    | -    | 0.69 | -  | -  | 1.10 | -  | -  |
| 95  | PF01183_Glycosyl hydrolases family 25                                   | -  | -    | -    | -    | -    | -    | -    | -    | -    | -    | -   | 5.04 | 1.74 | 2.07 | -  | -  | 3.31 | -  | -  |
| 96  | PF01202_Shikimate kinase                                                | -  | -    | -    | -    | -    | -    | -    | -    | -    | -    | -   | -    | -    | -    | -  | -  | 0.55 | -  | -  |
| 97  | PF01226_Formate/nitrite transporter                                     | -  | -    | -    | -    | -    | -    | -    | -    | -    | -    | -   | -    | 0.58 | -    | -  | -  | -    | -  | -  |
| 98  | PF01228_Glycine radical                                                 | -  | -    | -    | 0.89 | -    | -    | -    | -    | -    | -    | -   | -    | -    | -    | -  | -  | -    | -  | -  |
| 99  | PF01235_Sodium:alanine symporter family                                 | -  | -    | -    | -    | -    | 3.39 | -    | 2.41 | -    | -    | -   | -    | -    | 2.07 | -  | -  | -    | -  | -  |
| 100 | PF01244_Membrane dipeptidase (Peptidase family M19)                     | -  | -    | -    | -    | -    | -    | -    | -    | -    | -    | -   | -    | -    | 0.69 | -  | -  | -    | -  | -  |
| 101 | PF01270_Glycosyl hydrolases family 8                                    | -  | -    | -    | -    | -    | 1.69 | -    | 1.20 | -    | -    | -   | -    | -    | -    | -  | -  | -    | -  | -  |
| 102 | PF01297_Periplasmic solute binding protein family                       | -  | -    | 3.45 | 2.68 | -    | -    | -    | 1.20 | -    | -    | -   | -    | -    | 0.69 | -  | -  | 0.55 | -  | -  |
| 103 | PF01336_OB-fold nucleic acid binding domain                             | -  | -    | -    | -    | -    | -    | -    | -    | -    | -    | -   | -    | -    | 2.07 | -  | -  | -    | -  | -  |
| 104 | PF01339_CheB methylesterase                                             | -  | -    | -    | -    | -    | -    | -    | -    | -    | -    | -   | -    | -    | -    | -  | -  | 0.55 | -  | -  |

| #ID | Function                                                       | C1    | C2   | C3   | C4   | C5   | C6   | C7   | C8   | C9   | C10  | IC1  | V1   | V2   | V3   | V4   | V5   | V6   | V7   | V8   |
|-----|----------------------------------------------------------------|-------|------|------|------|------|------|------|------|------|------|------|------|------|------|------|------|------|------|------|
| 105 | PF01368_DHH family                                             | -     | -    | -    | -    | -    | -    | 3.70 | -    | -    | -    | -    | -    | -    | -    | -    | -    | -    | -    | -    |
| 106 | PF01370_NAD dependent epimerase/dehydratase family             | -     | -    | -    | -    | 1.49 | -    | -    | 1.20 | -    | -    | -    | -    | -    | -    | -    | -    | -    | -    | -    |
| 107 | PF01381_Helix-turn-helix                                       | -     | 1.89 | 3.45 | 2.68 | 7.46 | 3.39 | 7.41 | 3.61 | -    | 8.33 | -    | 3.36 | 2.91 | 2.76 | -    | 3.33 | 7.18 | 1.69 | 6.52 |
| 108 | PF01385_Probable transposase                                   | -     | -    | -    | -    | -    | -    | -    | -    | -    | -    | -    | -    | -    | 0.69 | -    | -    | -    | -    | -    |
| 109 | PF01391_Collagen triple helix repeat (20 copies)               | 12.90 | 1.89 | -    | -    | -    | -    | -    | 1.20 | -    | -    | -    | -    | 1.74 | 3.45 | -    | -    | 1.66 | -    | -    |
| 110 | PF01402_Ribbon-helix-helix protein. copG family                | -     | 0.94 | -    | -    | -    | -    | 1.85 | 1.20 | -    | 4.17 | 3.70 | 0.84 | -    | -    | -    | -    | -    | -    | -    |
| 111 | PF01418_Helix-turn-helix domain. rpiR family                   | -     | -    | -    | -    | -    | -    | -    | -    | -    | -    | -    | -    | 0.58 | 0.69 | -    | -    | 0.55 | -    | -    |
| 112 | PF01420_Type I restriction modification DNA specificity domain | -     | -    | -    | 0.89 | -    | -    | -    | -    | -    | -    | -    | -    | -    | -    | -    | -    | -    | -    | -    |
| 113 | PF01430_Hsp33 protein                                          | -     | -    | -    | -    | -    | -    | -    | -    | -    | -    | -    | -    | -    | -    | -    | -    | 0.55 | -    | -    |
| 114 | PF01443_Viral (Superfamily 1) RNA helicase                     | -     | 0.94 | -    | -    | -    | -    | -    | -    | -    | -    | -    | -    | -    | -    | -    | -    | -    | -    | -    |
| 115 | PF01446_Replication protein                                    | -     | 0.94 | -    | -    | 2.99 | -    | -    | 1.20 | -    | -    | -    | 0.84 | -    | -    | 3.85 | -    | -    | -    | -    |
| 116 | PF01464_Transglycosylase SLT domain                            | -     | -    | -    | -    | 1.49 | -    | -    | -    | -    | -    | -    | -    | 1.16 | -    | -    | -    | 1.10 | -    | -    |
| 117 | PF01471_Putative peptidoglycan binding domain                  | -     | -    | -    | -    | -    | -    | -    | -    | -    | -    | -    | 0.84 | -    | -    | -    | -    | -    | -    | -    |
| 118 | PF01473_Putative cell wall binding repeat                      | -     | -    | -    | -    | 2.99 | -    | -    | -    | -    | -    | -    | -    | -    | -    | -    | -    | 1.66 | -    | -    |
| 119 | PF01476_LysM domain                                            | -     | 0.94 | -    | -    | -    | -    | -    | -    | -    | -    | -    | 0.84 | -    | -    | 3.85 | -    | 1.10 | -    | -    |
| 120 | PF01507_Phosphoadenosine phosphosulfate reductase family       | -     | -    | -    | -    | -    | -    | -    | 1.20 | -    | -    | -    | -    | 0.58 | -    | -    | -    | -    | -    | -    |
| 121 | PF01510_N-acetylmuramoyl-L-alanine amidase                     | -     | -    | -    | -    | -    | 1.69 | -    | -    | -    | -    | -    | 0.84 | 2.33 | 3.45 | -    | -    | 1.66 | 1.69 | -    |
| 122 | PF01520_N-acetylmuramoyl-L-alanine amidase                     | -     | -    | -    | -    | 1.49 | -    | -    | 2.41 | -    | -    | -    | 0.84 | -    | 0.69 | -    | -    | -    | -    | -    |
| 123 | PF01527_Transposase                                            | -     | -    | -    | -    | -    | 1.69 | 1.85 | -    | -    | -    | 3.70 | -    | 0.58 | -    | -    | -    | -    | -    | -    |
| 124 | PF01541_GIY-YIG catalytic domain                               | -     | 0.94 | -    | -    | -    | -    | -    | -    | -    | -    | -    | -    | -    | -    | -    | -    | -    | -    | -    |
| 125 | PF01547_Bacterial extracellular solute-binding protein         | -     | -    | -    | -    | -    | -    | -    | -    | -    | -    | -    | -    | -    | 1.38 | -    | -    | -    | -    | -    |
| 126 | PF01551_Peptidase family M23                                   | -     | 0.94 | -    | -    | -    | -    | 1.85 | -    | -    | -    | -    | 0.84 | -    | 0.69 | -    | -    | 1.10 | -    | -    |
| 127 | PF01554_MatE                                                   | -     | -    | -    | -    | -    | -    | -    | -    | -    | -    | -    | -    | -    | 0.69 | -    | -    | -    | -    | -    |
| 128 | PF01555_DNA methylase                                          | 6.45  | 1.89 | -    | 0.89 | 1.49 | -    | 1.85 | -    | 4.35 | -    | -    | 0.84 | 0.58 | 0.69 | 3.85 | -    | 2.21 | -    | -    |
| 129 | PF01569_PAP2 superfamily                                       | -     | -    | -    | -    | -    | -    | -    | -    | -    | -    | -    | -    | -    | -    | -    | -    | 0.55 | -    | -    |
| 130 | PF01580_FtsK/SpoIIIE family                                    | 3.23  | -    | -    | -    | -    | -    | -    | -    | -    | -    | -    | -    | -    | 0.69 | -    | -    | 0.55 | -    | -    |
| 131 | PF01584_CheW-like domain                                       | -     | -    | -    | -    | -    | -    | -    | -    | -    | -    | -    | -    | -    | -    | -    | -    | 0.55 | -    | -    |

| #ID | Function                                                             | C1    | C2   | C3   | C4   | C5   | C6   | C7   | C8   | C9   | C10  | IC1  | V1    | V2   | V3   | V4         | V5   | V6         | V7 | V8 |
|-----|----------------------------------------------------------------------|-------|------|------|------|------|------|------|------|------|------|------|-------|------|------|------------|------|------------|----|----|
| 132 | PF01590_GAF domain                                                   | -     | -    | -    | -    | -    | -    | -    | -    | -    | -    | -    | -     | 0.58 | -    | -          | -    | -          | -  | -  |
| 133 | PF01594_Domain of unknown function DUF20                             | -     | -    | -    | 0.89 | -    | -    | -    | -    | -    | -    | -    | -     | -    | -    | -          | -    | 0.55       | -  | -  |
| 134 | PF01609_Transposase DDE domain                                       | -     | 0.94 | 3.45 | 0.89 | -    | -    | 5.56 | -    | -    | 4.17 | 7.41 | 0.84  | 1.74 | 0.69 | -          | -    | -          | -  | -  |
| 135 | PF01612_3'-5' exonuclease                                            | -     | 0.94 | -    | -    | 1.49 | -    | -    | -    | -    | -    | -    | -     | -    | -    | -          | -    | -          | -  | -  |
| 136 | PF01613_Flavin reductase like domain                                 | -     | -    | -    | -    | -    | -    | -    | -    | -    | -    | -    | 1.68  | -    | -    | -          | -    | -          | -  | -  |
| 137 | PF01660_Viral methyltransferase                                      | -     | 1.89 | -    | -    | -    | -    | -    | -    | -    | -    | -    | -     | -    | -    | -          | -    | -          | -  | -  |
| 138 | PF01661_Macro domain                                                 | -     | 0.94 | -    | -    | -    | -    | -    | -    | -    | -    | -    | -     | -    | -    | -          | -    | 0.55       | -  | -  |
| 139 | PF01694_Rhomboid family                                              | -     | -    | -    | -    | 1.49 | -    | -    | 1.20 | -    | -    | -    | -     | -    | -    | -          | -    | -          | -  | -  |
| 140 | PF01695_IstB-like ATP binding protein                                | -     | -    | -    | -    | -    | 1.69 | 3.70 | 1.20 | -    | -    | -    | -     | -    | 0.69 | -          | -    | -          | -  | -  |
| 141 | PF01719_Plasmid replication protein                                  | -     | 1.89 | -    | -    | -    | -    | 3.70 | -    | -    | 4.17 | 3.70 | 2.52  | -    | -    | -          | -    | -          | -  | -  |
| 142 | PF01734_Patatin-like phospholipase                                   | -     | -    | -    | -    | -    | -    | -    | -    | -    | 4.17 | -    | -     | -    | -    | -          | -    | -          | -  | -  |
| 143 | PF01757_Acyltransferase family                                       | -     | -    | -    | -    | -    | 1.69 | -    | -    | -    | -    | -    | 0.84  | -    | -    | -          | -    | -          | -  | -  |
| 144 | PF01797_Transposase IS200 like                                       | -     | -    | 3.45 | -    | -    | -    | -    | -    | -    | -    | -    | -     | -    | -    | -          | -    | -          | -  | -  |
| 145 | PF01832_Mannosyl-glycoprotein endo-beta-N-acetylglucosaminidase      | -     | -    | -    | -    | -    | 1.69 | -    | 1.20 | -    | -    | -    | 0.84  | -    | -    | -          | -    | -          | -  | -  |
| 146 | PF01844_HNH endonuclease                                             | 3.23  | 1.89 | -    | 0.89 | 1.49 | -    | -    | -    | 4.35 | -    | -    | 2.52  | 1.74 | 0.69 | -          | -    | 1.10       | -  | -  |
| 147 | PF01850_PIN domain                                                   | -     | -    | 3.45 | 0.89 | -    | -    | -    | -    | -    | -    | -    | -     | -    | -    | -          | -    | -          | -  | -  |
| 148 | PF01925_Domain of unknown function DUF81                             | -     | -    | -    | -    | -    | -    | -    | -    | -    | -    | 3.70 | -     | -    | -    | -          | -    | -          | -  | -  |
| 149 | PF02065_Melibiase                                                    | -     | -    | -    | -    | -    | -    | -    | -    | -    | -    | -    | -     | -    | 0.69 | -          | -    | -          | -  | -  |
| 150 | PF02082_Transcriptional regulator                                    | -     | -    | -    | -    | -    | 1.69 | -    | 1.20 | -    | -    | -    | -     | -    | -    | -          | -    | -          | -  | -  |
| 151 | PF02086_D12 class N6 adenine-specific DNA methyltransferase          | 6.45  | 1.89 | -    | -    | 1.49 | -    | -    | -    | -    | -    | -    | -     | -    | -    | -          | -    | -          | -  | -  |
| 152 | PF02185_Hr1 repeat                                                   | -     | -    | -    | -    | -    | 1.69 | -    | -    | 4.35 | -    | -    | -     | -    | -    | -          | -    | -          | -  | -  |
| 153 | PF02190_ATP-dependent protease La (LON) domain                       | -     | -    | -    | -    | 1.49 | -    | -    | -    | -    | -    | -    | -     | -    | -    | -          | -    | -          | -  | -  |
| 154 | PF02275_Linear amide C-N hydrolases. choloylglycine hydrolase family | -     | -    | -    | -    | -    | -    | -    | -    | -    | -    | -    | -     | 0.69 | -    | -          | -    | -          | -  | -  |
| 155 | PF02305_Capsid protein (F protein)                                   | 22.58 | 1.89 | 3.45 | -    | 7.46 | -    | -    | 6.02 | -    | -    | -    | 10.08 | 3.49 | 3.45 | 26.9280.00 | 0.55 | 54.2439.13 | -  | -  |
| 156 | PF02311_AraC-like ligand binding domain                              | -     | -    | -    | -    | -    | -    | -    | -    | -    | -    | -    | -     | -    | 0.69 | -          | -    | -          | -  | -  |
| 157 | PF02325_YGGT family                                                  | -     | -    | -    | -    | -    | 1.69 | -    | -    | -    | -    | -    | -     | -    | -    | -          | -    | -          | -  | -  |
| 158 | PF02368_Bacterial Ig-like domain (group 2)                           | -     | 0.94 | -    | -    | -    | -    | -    | -    | -    | -    | -    | -     | 0.58 | 0.69 | -          | -    | 1.10       | -  | -  |

| #ID | Function                                                                | C1   | C2   | C3 | C4   | C5   | C6   | C7   | C8   | C9 | C10  | IC1  | V1   | V2   | V3   | V4   | V5 | V6   | V7 | V8   |
|-----|-------------------------------------------------------------------------|------|------|----|------|------|------|------|------|----|------|------|------|------|------|------|----|------|----|------|
| 159 | PF02371_Transposase IS116/IS110/IS902 family                            | -    | -    | -  | -    | -    | -    | -    | -    | -  | -    | -    | -    | -    | -    | -    | -  | 0.55 | -  | -    |
| 160 | PF02384_N-6 DNA Methylase                                               | -    | -    | -  | -    | -    | -    | -    | -    | -  | -    | -    | -    | -    | -    | -    | -  | 1.10 | -  | -    |
| 161 | PF02386_Cation transport protein                                        | -    | -    | -  | -    | -    | -    | -    | -    | -  | -    | -    | -    | -    | -    | -    | -  | 0.55 | -  | -    |
| 162 | PF02391_MoaE protein                                                    | -    | -    | -  | -    | -    | -    | -    | -    | -  | -    | 3.70 | -    | -    | -    | -    | -  | -    | -  | -    |
| 163 | PF02413_Caudovirales tail fibre assembly protein                        | -    | -    | -  | -    | -    | -    | -    | -    | -  | -    | -    | -    | 2.33 | -    | -    | -  | 1.10 | -  | -    |
| 164 | PF02424_ApbE family                                                     | -    | -    | -  | -    | -    | -    | -    | -    | -  | -    | -    | 0.84 | -    | -    | -    | -  | -    | -  | -    |
| 165 | PF02452_PemK-like protein                                               | -    | -    | -  | -    | 1.49 | -    | -    | -    | -  | -    | -    | -    | -    | -    | -    | -  | -    | -  | -    |
| 166 | PF02498_BRO family. N-terminal domain                                   | -    | 2.83 | -  | -    | -    | -    | 1.85 | -    | -  | 4.17 | -    | 2.52 | 0.58 | 2.07 | 3.85 | -  | 0.55 | -  | 6.52 |
| 167 | PF02518_Histidine kinase-. DNA gyrase B-. and HSP90-like ATPase         | -    | -    | -  | -    | -    | -    | -    | -    | -  | -    | -    | 0.84 | -    | -    | -    | -  | -    | -  | -    |
| 168 | PF02534_TraG/TraD family                                                | -    | -    | -  | -    | -    | -    | -    | -    | -  | -    | -    | -    | -    | 0.69 | -    | -  | -    | -  | -    |
| 169 | PF02557_D-alanyl-D-alanine carboxypeptidase                             | 3.23 | -    | -  | -    | -    | -    | -    | -    | -  | -    | -    | -    | -    | -    | -    | -  | -    | -  | -    |
| 170 | PF02562_Phoh-like protein                                               | -    | -    | -  | -    | -    | -    | -    | -    | -  | -    | -    | -    | 0.58 | -    | -    | -  | -    | -  | -    |
| 171 | PF02586_Uncharacterised ACR. COG2135                                    | -    | -    | -  | -    | -    | -    | -    | -    | -  | -    | 3.70 | -    | -    | 0.69 | -    | -  | -    | -  | -    |
| 172 | PF02588_Uncharacterized BCR. YitT family COG1284                        | -    | -    | -  | -    | -    | -    | 1.85 | -    | -  | 4.17 | -    | -    | -    | -    | -    | -  | 1.66 | -  | -    |
| 173 | PF02600_Disulfide bond formation protein DsbB                           | -    | -    | -  | -    | -    | 1.69 | -    | 1.20 | -  | -    | -    | -    | -    | -    | -    | -  | -    | -  | -    |
| 174 | PF02601_Exonuclease VII. large subunit                                  | -    | -    | -  | -    | -    | -    | -    | -    | -  | -    | -    | -    | -    | -    | -    | -  | 0.55 | -  | -    |
| 175 | PF02609_Exonuclease VII small subunit                                   | -    | -    | -  | -    | -    | -    | -    | -    | -  | -    | -    | -    | -    | -    | -    | -  | 0.55 | -  | -    |
| 176 | PF02630_SCO1/SenC                                                       | -    | -    | -  | -    | -    | 1.69 | -    | 1.20 | -  | -    | -    | -    | -    | -    | -    | -  | -    | -  | -    |
| 177 | PF02661_Fic/DOC family                                                  | -    | -    | -  | -    | -    | -    | -    | -    | -  | -    | 3.70 | -    | -    | -    | -    | -  | -    | -  | -    |
| 178 | PF02706_Chain length determinant protein                                | -    | -    | -  | -    | -    | -    | -    | -    | -  | -    | -    | -    | 0.58 | -    | -    | -  | -    | -  | -    |
| 179 | PF02711_E4 protein                                                      | -    | -    | -  | 0.89 | -    | -    | -    | -    | -  | -    | -    | -    | -    | -    | -    | -  | -    | -  | -    |
| 180 | PF02719_Polysaccharide biosynthesis protein                             | -    | -    | -  | -    | -    | -    | -    | -    | -  | -    | -    | -    | -    | -    | -    | -  | 0.55 | -  | -    |
| 181 | PF02732_ERCC4 domain                                                    | -    | -    | -  | -    | -    | -    | -    | -    | -  | -    | -    | 0.84 | -    | -    | -    | -  | -    | -  | -    |
| 182 | PF02742_Iron dependent repressor. metal binding and dimerisation domain | -    | -    | -  | -    | -    | -    | -    | -    | -  | -    | -    | -    | 0.58 | -    | -    | -  | -    | -  | -    |
| 183 | PF02796_Helix-turn-helix domain of resolvase                            | -    | 0.94 | -  | -    | -    | -    | -    | -    | -  | -    | -    | -    | -    | -    | -    | -  | -    | -  | -    |
| 184 | PF02811_PHP domain                                                      | -    | -    | -  | -    | -    | -    | -    | -    | -  | -    | -    | -    | -    | -    | -    | -  | 1.10 | -  | -    |
| 185 | PF02836_Glycosyl hydrolases family 2. TIM barrel domain                 | -    | -    | -  | -    | -    | -    | -    | -    | -  | -    | -    | 0.84 | 1.16 | 0.69 | 3.85 | -  | -    | -  | -    |







| #ID | Function                                                       | C1   | C2   | C3   | C4   | C5   | C6   | C7   | C8   | C9   | C10 | IC1 | V1   | V2   | V3   | V4   | V5 | V6   | V7 | V8   |
|-----|----------------------------------------------------------------|------|------|------|------|------|------|------|------|------|-----|-----|------|------|------|------|----|------|----|------|
| 239 | PF04383_KilA-N domain                                          | -    | -    | -    | -    | -    | -    | -    | -    | 4.35 | -   | -   | -    | 1.16 | -    | -    | -  | -    | -  | -    |
| 240 | PF04404_ERF superfamily                                        | -    | -    | 3.45 | -    | -    | -    | -    | 1.20 | -    | -   | -   | 1.68 | 1.16 | 2.07 | 3.85 | -  | -    | -  | -    |
| 241 | PF04471_Restriction endonuclease                               | -    | -    | -    | -    | -    | -    | -    | -    | -    | -   | -   | -    | -    | -    | -    | -  | 0.55 | -  | -    |
| 242 | PF04546_Sigma-70. non-essential region                         | -    | -    | -    | -    | -    | -    | -    | -    | -    | -   | -   | -    | 0.58 | -    | -    | -  | -    | -  | -    |
| 243 | PF04586_Caudovirus prohead protease                            | -    | -    | -    | -    | -    | -    | -    | -    | -    | -   | -   | -    | 1.16 | -    | -    | -  | -    | -  | -    |
| 244 | PF04606_Ogr/Delta-like zinc finger                             | -    | -    | -    | -    | -    | -    | -    | -    | -    | -   | -   | -    | 0.58 | -    | -    | -  | -    | -  | -    |
| 245 | PF04771_Chicken anaemia virus VP-3 protein                     | -    | -    | -    | -    | -    | -    | -    | -    | -    | -   | -   | 0.84 | -    | -    | -    | -  | -    | -  | -    |
| 246 | PF04796_Plasmid encoded RepA protein                           | -    | -    | -    | -    | -    | 1.69 | -    | 1.20 | -    | -   | -   | -    | -    | -    | -    | -  | -    | -  | -    |
| 247 | PF04851_Type III restriction enzyme. res subunit               | -    | -    | -    | -    | -    | -    | -    | -    | 4.35 | -   | -   | 0.84 | 1.74 | 0.69 | -    | -  | 1.66 | -  | -    |
| 248 | PF04861_Gyrovirus VP2 protein                                  | -    | -    | -    | -    | -    | -    | -    | -    | -    | -   | -   | 0.84 | -    | -    | -    | -  | -    | -  | -    |
| 249 | PF04865_Baseplate J-like protein                               | -    | -    | -    | -    | -    | -    | -    | 1.20 | -    | -   | -   | -    | 1.16 | 2.76 | -    | -  | 0.55 | -  | -    |
| 250 | PF04917_Bacterial shufflon protein. N-terminal constant region | -    | -    | -    | -    | -    | -    | -    | 1.20 | -    | -   | -   | -    | -    | -    | -    | -  | -    | -  | -    |
| 251 | PF04965_Gene 25-like lysozyme                                  | 3.23 | -    | -    | -    | -    | -    | -    | -    | -    | -   | -   | -    | -    | -    | -    | -  | -    | -  | -    |
| 252 | PF04984_Phage tail sheath protein                              | -    | -    | -    | 0.89 | -    | -    | -    | -    | -    | -   | -   | -    | -    | -    | -    | -  | -    | -  | -    |
| 253 | PF05036_Sporulation related domain                             | -    | -    | -    | -    | -    | -    | -    | -    | -    | -   | -   | -    | 0.58 | -    | -    | -  | -    | -  | -    |
| 254 | PF05037_Protein of unknown function (DUF669)                   | -    | -    | -    | -    | -    | -    | -    | -    | -    | -   | -   | -    | -    | -    | -    | -  | 0.55 | -  | -    |
| 255 | PF05063_MT-A70                                                 | -    | -    | -    | -    | -    | -    | -    | -    | -    | -   | -   | -    | -    | -    | -    | -  | 0.55 | -  | -    |
| 256 | PF05065_Phage capsid family                                    | -    | 0.94 | -    | -    | -    | -    | -    | -    | -    | -   | -   | -    | -    | -    | -    | -  | 0.55 | -  | -    |
| 257 | PF05193_Peptidase M16 inactive domain                          | -    | 1.89 | -    | -    | 1.49 | -    | -    | -    | -    | -   | -   | -    | 0.58 | -    | -    | -  | -    | -  | -    |
| 258 | PF05203_Hom_end-associated Hint                                | -    | -    | -    | -    | 1.49 | -    | -    | 1.20 | -    | -   | -   | 0.84 | -    | -    | -    | -  | -    | -  | -    |
| 259 | PF05257_CHAP domain                                            | -    | -    | -    | -    | -    | -    | 1.85 | -    | -    | -   | -   | -    | -    | -    | -    | -  | -    | -  | -    |
| 260 | PF05268_Phage tail fibre adhesin Gp38                          | -    | -    | -    | 4.46 | -    | -    | -    | -    | -    | -   | -   | -    | -    | -    | -    | -  | -    | -  | -    |
| 261 | PF05272_Virulence-associated protein E                         | 3.23 | 0.94 | -    | 2.68 | 1.49 | -    | -    | -    | -    | -   | -   | -    | -    | 0.69 | -    | -  | 0.55 | -  | -    |
| 262 | PF05282_AAR2 protein                                           | -    | -    | -    | -    | -    | 1.69 | -    | -    | 4.35 | -   | -   | -    | -    | -    | -    | -  | -    | -  | -    |
| 263 | PF05352_Phage Connector (GP10)                                 | -    | 0.94 | -    | -    | -    | -    | -    | -    | -    | -   | -   | 3.36 | 0.58 | 0.69 | 3.85 | -  | 1.66 | -  | 2.17 |
| 264 | PF05396_Phage T7 capsid assembly protein                       | -    | -    | -    | 1.79 | -    | -    | -    | -    | -    | -   | -   | -    | -    | -    | -    | -  | -    | -  | -    |
| 265 | PF05534_HicB family                                            | -    | -    | -    | -    | -    | -    | -    | -    | -    | -   | -   | 0.84 | -    | 0.69 | -    | -  | -    | -  | -    |

| #ID | Function                                               | C1   | C2   | C3   | C4   | C5   | C6   | C7   | C8   | C9 | C10  | IC1  | V1   | V2   | V3   | V4 | V5 | V6   | V7    | V8   |
|-----|--------------------------------------------------------|------|------|------|------|------|------|------|------|----|------|------|------|------|------|----|----|------|-------|------|
| 266 | PF05565_Siphovirus Gp157                               | 3.23 | -    | -    | -    | 1.49 | -    | -    | -    | -  | -    | -    | -    | -    | -    | -  | -  | -    | -     | -    |
| 267 | PF05592_Bacterial alpha-L-rhamnosidase                 | -    | -    | -    | -    | -    | -    | -    | -    | -  | -    | -    | -    | -    | 0.69 | -  | -  | -    | -     | -    |
| 268 | PF05595_Domain of unknown function (DUF771)            | -    | -    | -    | -    | -    | -    | 1.85 | -    | -  | -    | -    | -    | -    | -    | -  | -  | -    | -     | -    |
| 269 | PF05666_Fels-1 Prophage Protein-like                   | -    | -    | -    | -    | -    | -    | -    | -    | -  | -    | -    | -    | 0.58 | -    | -  | -  | -    | -     | -    |
| 270 | PF05707_Zonular occludens toxin (Zot)                  | -    | -    | -    | -    | -    | -    | -    | -    | -  | -    | -    | -    | 0.58 | -    | -  | -  | -    | -     | -    |
| 271 | PF05709_Siphovirus tail component protein              | -    | -    | 3.45 | -    | -    | -    | -    | -    | -  | -    | -    | -    | -    | -    | -  | -  | -    | -     | -    |
| 272 | PF05713_Bacterial mobilisation protein (MobC)          | -    | -    | -    | -    | -    | 1.69 | -    | 1.20 | -  | -    | -    | -    | -    | -    | -  | -  | -    | -     | -    |
| 273 | PF05762_VWA domain containing CoxE-like protein        | -    | -    | -    | -    | -    | -    | -    | -    | -  | -    | -    | -    | 1.16 | -    | -  | -  | -    | -     | -    |
| 274 | PF05798_Bacteriophage FRD3 protein                     | -    | -    | -    | 0.89 | -    | -    | -    | -    | -  | -    | -    | -    | -    | -    | -  | -  | -    | -     | -    |
| 275 | PF05838_Predicted lysozyme (DUF847)                    | -    | -    | -    | 0.89 | 1.49 | -    | -    | -    | -  | -    | -    | -    | -    | -    | -  | -  | -    | -     | -    |
| 276 | PF05866_Endodeoxyribonuclease RusA                     | -    | -    | -    | -    | -    | -    | -    | -    | -  | -    | -    | 0.84 | 1.74 | 0.69 | -  | -  | 0.55 | -     | -    |
| 277 | PF05876_Phage terminase large subunit (GpA)            | 3.23 | 0.94 | -    | 0.89 | -    | -    | -    | -    | -  | -    | -    | -    | -    | -    | -  | -  | -    | -     | -    |
| 278 | PF05939_Phage minor tail protein                       | -    | -    | -    | -    | 1.49 | -    | -    | -    | -  | -    | -    | -    | -    | -    | -  | -  | -    | -     | -    |
| 279 | PF05940_NnrS protein                                   | -    | -    | -    | -    | -    | -    | -    | -    | -  | -    | 3.70 | -    | -    | -    | -  | -  | -    | -     | -    |
| 280 | PF05951_Bacterial protein of unknown function (DUF882) | -    | -    | -    | -    | -    | -    | -    | -    | -  | -    | -    | -    | -    | -    | -  | -  | -    | 27.12 | -    |
| 281 | PF05954_Phage late control gene D protein (GPD)        | -    | -    | -    | -    | -    | -    | -    | -    | -  | -    | -    | 0.84 | -    | -    | -  | -  | -    | -     | -    |
| 282 | PF05973_Phage derived protein Gp49-like (DUF891)       | -    | -    | -    | -    | -    | 1.69 | -    | -    | -  | -    | -    | -    | -    | -    | -  | -  | -    | -     | -    |
| 283 | PF05991_Protein of unknown function (DUF901)           | -    | -    | -    | -    | -    | -    | -    | -    | -  | -    | -    | -    | -    | -    | -  | -  | 0.55 | -     | -    |
| 284 | PF06048_Domain of unknown function (DUF927)            | -    | -    | -    | -    | -    | -    | 1.85 | -    | -  | 4.17 | -    | -    | -    | -    | -  | -  | 0.55 | -     | -    |
| 285 | PF06050_2-hydroxyglutaryl-CoA dehydratase. D-component | -    | -    | -    | -    | -    | -    | -    | -    | -  | -    | -    | -    | 0.58 | -    | -  | -  | -    | -     | -    |
| 286 | PF06081_Bacterial protein of unknown function (DUF939) | -    | -    | -    | -    | -    | 1.69 | -    | -    | -  | -    | -    | -    | -    | -    | -  | -  | -    | -     | -    |
| 287 | PF06094_AIG2-like family                               | -    | -    | -    | -    | -    | -    | -    | -    | -  | -    | -    | -    | -    | -    | -  | -  | 0.55 | -     | -    |
| 288 | PF06114_Domain of unknown function (DUF955)            | -    | -    | -    | -    | -    | -    | -    | -    | -  | -    | -    | -    | -    | 0.69 | -  | -  | 1.10 | -     | 2.17 |
| 289 | PF06123_Inner membrane protein CreD                    | -    | -    | -    | -    | -    | -    | -    | -    | -  | -    | -    | -    | 0.58 | -    | -  | -  | -    | -     | -    |
| 290 | PF06147_Protein of unknown function (DUF968)           | 3.23 | -    | -    | -    | -    | -    | -    | -    | -  | -    | -    | -    | -    | -    | -  | -  | 0.55 | -     | -    |
| 291 | PF06152_Phage minor capsid protein 2                   | -    | -    | -    | -    | -    | -    | -    | -    | -  | -    | -    | -    | 0.58 | -    | -  | -  | 0.55 | -     | -    |
| 292 | PF06154_YagB/YeeU/YfjZ family                          | -    | -    | -    | -    | -    | -    | -    | -    | -  | -    | -    | -    | 0.58 | -    | -  | -  | -    | -     | -    |

| #ID | Function                                                           | C1 | C2   | C3   | C4   | C5   | C6   | C7   | C8   | C9   | C10 | IC1  | V1   | V2   | V3   | V4   | V5 | V6   | V7 | V8 |
|-----|--------------------------------------------------------------------|----|------|------|------|------|------|------|------|------|-----|------|------|------|------|------|----|------|----|----|
| 293 | PF06204_Putative carbohydrate binding domain                       | -  | -    | -    | -    | -    | -    | -    | -    | -    | -   | -    | -    | -    | 0.69 | -    | -  | -    | -  | -  |
| 294 | PF06250_Protein of unknown function (DUF1016)                      | -  | -    | -    | -    | -    | -    | -    | 2.41 | -    | -   | -    | -    | -    | -    | -    | -  | 1.10 | -  | -  |
| 295 | PF06347_Bacterial SH3 domain                                       | -  | -    | -    | -    | -    | 3.39 | -    | 3.61 | 4.35 | -   | -    | -    | -    | -    | -    | -  | -    | -  | -  |
| 296 | PF06378_Protein of unknown function (DUF1071)                      | -  | -    | -    | -    | -    | -    | -    | -    | -    | -   | -    | -    | 1.74 | -    | 3.85 | -  | -    | -  | -  |
| 297 | PF06445_Bacterial transcription activator. effector binding domain | -  | -    | -    | -    | -    | 1.69 | -    | -    | -    | -   | -    | -    | 0.58 | -    | -    | -  | -    | -  | -  |
| 298 | PF06488_Lactococcus lactis bacteriophage major structural protein  | -  | -    | -    | -    | -    | -    | -    | -    | -    | -   | -    | -    | -    | -    | -    | -  | 1.10 | -  | -  |
| 299 | PF06491_Protein of unknown function (DUF1094)                      | -  | -    | -    | -    | -    | -    | -    | 1.20 | -    | -   | -    | -    | -    | -    | -    | -  | -    | -  | -  |
| 300 | PF06520_Protein of unknown function (DUF1105)                      | -  | -    | -    | -    | -    | -    | -    | -    | -    | -   | -    | -    | 0.58 | -    | -    | -  | -    | -  | -  |
| 301 | PF06530_Phage antitermination protein Q                            | -  | -    | -    | -    | -    | -    | -    | -    | -    | -   | -    | -    | -    | 0.69 | -    | -  | -    | -  | -  |
| 302 | PF06555_Protein of unknown function (DUF1121)                      | -  | -    | -    | -    | -    | -    | -    | -    | -    | -   | -    | -    | -    | -    | -    | -  | 0.55 | -  | -  |
| 303 | PF06714_Gp5 N-terminal OB domain                                   | -  | -    | -    | 1.79 | -    | -    | -    | -    | -    | -   | -    | -    | -    | -    | -    | -  | -    | -  | -  |
| 304 | PF06715_Gp5 C-terminal repeat (3 copies)                           | -  | -    | -    | 1.79 | -    | -    | -    | -    | -    | -   | -    | -    | -    | -    | -    | -  | -    | -  | -  |
| 305 | PF06725_3D domain                                                  | -  | -    | -    | -    | -    | -    | -    | -    | -    | -   | -    | -    | 1.16 | -    | -    | -  | -    | -  | -  |
| 306 | PF06737_Transglycosylase-like domain                               | -  | -    | -    | -    | 1.49 | -    | -    | -    | 4.35 | -   | -    | -    | -    | -    | -    | -  | -    | -  | -  |
| 307 | PF06838_Aluminium resistance protein                               | -  | -    | -    | -    | -    | -    | -    | 1.20 | -    | -   | -    | -    | -    | -    | -    | -  | -    | -  | -  |
| 308 | PF06841_T4-like virus tail tube protein gp19                       | -  | -    | -    | 0.89 | -    | -    | -    | -    | -    | -   | -    | -    | -    | -    | -    | -  | -    | -  | -  |
| 309 | PF06893_Bacteriophage Mu P protein                                 | -  | -    | -    | 0.89 | -    | -    | -    | -    | -    | -   | -    | -    | -    | -    | -    | -  | -    | -  | -  |
| 310 | PF06895_Protein of unknown function (DUF1267)                      | -  | 0.94 | -    | -    | -    | -    | -    | -    | -    | -   | -    | -    | -    | -    | -    | -  | -    | -  | -  |
| 311 | PF06914_Protein of unknown function (DUF1277)                      | -  | -    | -    | -    | -    | -    | -    | -    | -    | -   | -    | -    | 0.58 | -    | -    | -  | -    | -  | -  |
| 312 | PF06953_Arsenical resistance operon trans-acting repressor ArsD    | -  | -    | -    | -    | -    | -    | -    | 1.20 | -    | -   | -    | -    | -    | -    | -    | -  | -    | -  | -  |
| 313 | PF06965_Na+/H+ antiporter 1                                        | -  | -    | -    | -    | -    | -    | 1.85 | -    | -    | -   | -    | -    | -    | -    | -    | -  | -    | -  | -  |
| 314 | PF07031_Protein of unknown function (DUF1321)                      | -  | 0.94 | -    | -    | -    | -    | -    | -    | -    | -   | -    | -    | -    | -    | -    | -  | -    | -  | -  |
| 315 | PF07043_Protein of unknown function (DUF1328)                      | -  | -    | -    | -    | -    | -    | -    | -    | -    | -   | 3.70 | -    | -    | -    | -    | -  | -    | -  | -  |
| 316 | PF07066_Lactococcus phage M3 protein                               | -  | -    | 3.45 | -    | -    | -    | -    | -    | -    | -   | -    | 0.84 | -    | -    | -    | -  | -    | -  | -  |
| 317 | PF07068_Major capsid protein Gp23                                  | -  | -    | -    | 1.79 | -    | -    | -    | -    | -    | -   | -    | -    | -    | -    | -    | -  | -    | -  | -  |
| 318 | PF07083_Protein of unknown function (DUF1351)                      | -  | -    | -    | -    | -    | -    | -    | -    | -    | -   | -    | -    | -    | 0.69 | -    | -  | -    | -  | -  |
| 319 | PF07102_Protein of unknown function (DUF1364)                      | -  | -    | -    | -    | -    | -    | -    | -    | -    | -   | -    | -    | 0.58 | -    | -    | -  | -    | -  | -  |



| #ID | Function                                                 | C1 | C2 | C3    | C4    | C5    | C6   | C7   | C8   | C9    | C10   | IC1  | V1   | V2   | V3   | V4   | V5    | V6   | V7    | V8   |
|-----|----------------------------------------------------------|----|----|-------|-------|-------|------|------|------|-------|-------|------|------|------|------|------|-------|------|-------|------|
| 347 | PF07880_Bacteriophage T4 gp9/10-like protein             | -  | -  | -     | 0.89  | -     | -    | -    | -    | -     | -     | -    | -    | -    | -    | -    | -     | -    | -     | -    |
| 348 | PF07907_YibE/F-like protein                              | -  | -  | -     | -     | -     | -    | -    | -    | -     | 8.33  | -    | -    | -    | -    | -    | -     | -    | -     | -    |
| 349 | PF07927_YcfA-like protein                                | -  | -  | -     | -     | -     | -    | -    | -    | -     | -     | -    | -    | -    | 0.69 | -    | -     | -    | -     | -    |
| 350 | PF07943_Penicillin-binding protein 5. C-terminal domain  | -  | -  | -     | -     | -     | -    | -    | -    | -     | -     | -    | -    | 0.58 | -    | -    | -     | -    | -     | -    |
| 351 | PF08010_Bacteriophage protein GP30.3                     | -  | -  | -     | 0.89  | -     | -    | -    | -    | -     | -     | -    | -    | -    | -    | -    | -     | -    | -     | -    |
| 352 | PF08199_Bacteriophage E2-like protein                    | -  | -  | -     | -     | -     | -    | -    | -    | -     | -     | -    | 0.84 | -    | -    | -    | -     | -    | -     | -    |
| 353 | PF08220_DeoR-like helix-turn-helix domain                | -  | -  | -     | 0.89  | -     | -    | -    | -    | -     | -     | -    | -    | -    | -    | -    | -     | -    | -     | -    |
| 354 | PF08230_Cpl-7 lysozyme C-terminal domain                 | -  | -  | -     | -     | -     | -    | -    | -    | -     | -     | -    | -    | -    | 0.69 | -    | -     | 0.55 | -     | -    |
| 355 | PF08238_Sel1 repeat                                      | -  | -  | -     | -     | -     | -    | -    | -    | -     | -     | -    | -    | -    | -    | -    | -     | 0.55 | -     | -    |
| 356 | PF08239_Bacterial SH3 domain                             | -  | -  | -     | -     | -     | -    | -    | -    | -     | -     | -    | 1.68 | -    | 0.69 | -    | -     | -    | -     | 2.17 |
| 357 | PF08245_Mur ligase middle domain                         | -  | -  | -     | -     | -     | -    | -    | 1.20 | -     | -     | -    | -    | -    | -    | -    | -     | -    | -     | -    |
| 358 | PF08275_DNA primase catalytic core. N-terminal domain    | -  | -  | -     | 0.89  | -     | -    | -    | -    | -     | -     | -    | -    | -    | -    | -    | -     | -    | -     | -    |
| 359 | PF08291_Peptidase M15                                    | -  | -  | 41.38 | 16.07 | 16.42 | 1.69 | 3.70 | 2.41 | 21.74 | 16.67 | 3.70 | 1.68 | 2.91 | 2.07 | 7.69 | 16.67 | -    | 10.17 | 2.17 |
| 360 | PF08327_Activator of Hsp90 ATPase homolog 1-like protein | -  | -  | -     | -     | -     | 1.69 | -    | 1.20 | -     | -     | -    | -    | -    | -    | -    | -     | -    | -     | -    |
| 361 | PF08333_Protein of unknown function (DUF1725)            | -  | -  | -     | -     | -     | -    | -    | -    | -     | -     | -    | 0.84 | -    | -    | -    | -     | -    | -     | -    |
| 362 | PF08346_AntA/AntB antirepressor                          | -  | -  | -     | -     | -     | 1.69 | -    | -    | -     | -     | -    | 1.68 | 0.58 | -    | -    | -     | -    | -     | -    |
| 363 | PF08706_D5 N terminal like                               | -  | -  | -     | -     | -     | -    | -    | -    | -     | -     | -    | -    | -    | 1.38 | -    | -     | -    | -     | -    |
| 364 | PF08707_Primase C terminal 2 (PriCT-2)                   | -  | -  | -     | -     | -     | -    | -    | -    | -     | 4.17  | -    | -    | -    | -    | -    | -     | 1.66 | -     | -    |
| 365 | PF08708_Primase C terminal 1 (PriCT-1)                   | -  | -  | -     | -     | -     | -    | 1.85 | -    | -     | 4.17  | -    | -    | -    | -    | -    | -     | -    | -     | -    |
| 366 | PF08774_VRR-NUC domain                                   | -  | -  | -     | 0.89  | -     | -    | -    | -    | 4.35  | -     | -    | 0.84 | -    | -    | -    | -     | 0.55 | -     | -    |
| 367 | PF08804_gp32 DNA binding protein like                    | -  | -  | -     | 0.89  | -     | -    | -    | -    | -     | -     | -    | -    | -    | -    | -    | -     | -    | -     | -    |
| 368 | PF08818_Domain of unknown function (DU1801)              | -  | -  | -     | -     | -     | 1.69 | -    | -    | -     | -     | -    | -    | -    | -    | -    | -     | -    | -     | -    |
| 369 | PF08857_Putative ParB-like nuclease                      | -  | -  | -     | -     | -     | 1.69 | -    | -    | -     | -     | -    | -    | -    | -    | -    | -     | -    | -     | -    |
| 370 | PF08867_FRG domain                                       | -  | -  | -     | 0.89  | -     | -    | -    | -    | -     | -     | -    | -    | -    | -    | -    | -     | -    | -     | -    |
| 371 | PF08890_Phage XkdN-like protein                          | -  | -  | -     | -     | -     | -    | -    | -    | -     | -     | -    | -    | -    | 0.69 | -    | -     | -    | -     | -    |
| 372 | PF08900_Domain of unknown function (DUF1845)             | -  | -  | -     | -     | -     | -    | -    | 1.20 | -     | -     | -    | -    | -    | -    | -    | -     | -    | -     | -    |
| 373 | PF08918_PhoQ Sensor                                      | -  | -  | -     | -     | -     | -    | -    | -    | -     | -     | -    | -    | 0.58 | -    | -    | -     | -    | -     | -    |
